# Supplementary material for: A novel wound dressing based on a gold nanoparticle self-assembled hydrogel to promote wound healing
Source: Royal Society of Chemistry journal article supplement (doi:10.1039/d3ma00130j), 2023-01-01
Supplement: d3ma00130j1.pdf [file d3ma00130j1.pdf]

## Supporting Information

### **A novel wound dressing based on gold nanoparticles self-assembled hydrogel to promote wound healing**

Weihong Chen <sup>a,†</sup>, Ruixi Chu <sup>b,c,†</sup>, Hualong Li <sup>d,†</sup>, Tianfeng Hua <sup>a</sup>, Hong Chen <sup>b</sup>, Rui Li <sup>b</sup>, Deqing Zhou <sup>c</sup>, Sufeng Cao <sup>c</sup>, Sheng Ye <sup>b,\*</sup>, He Li <sup>a,\*</sup>

<sup>a</sup> Department of Emergency Surgery & The 2nd Department of Intensive Care Unit, the Second Hospital of Anhui Medical University, Hefei, Anhui 230001, China

<sup>b</sup> College of Science & School of Plant Protection, Anhui Agricultural University, Hefei, Anhui 230036, China

<sup>c</sup> College of Animal Science and Technology, Anhui Agricultural University, Hefei, Anhui 230036, China

<sup>d</sup> People's Hospital of Fengyang County, Chuzhou, Anhui 233100, China.

<sup>e</sup> Aramco Americas Boston Research Center, 400 Technology Square, Cambridge, MA 02139, United States

\* Email: lihe@ahmu.edu.cn, sye503@ahau.edu.cn

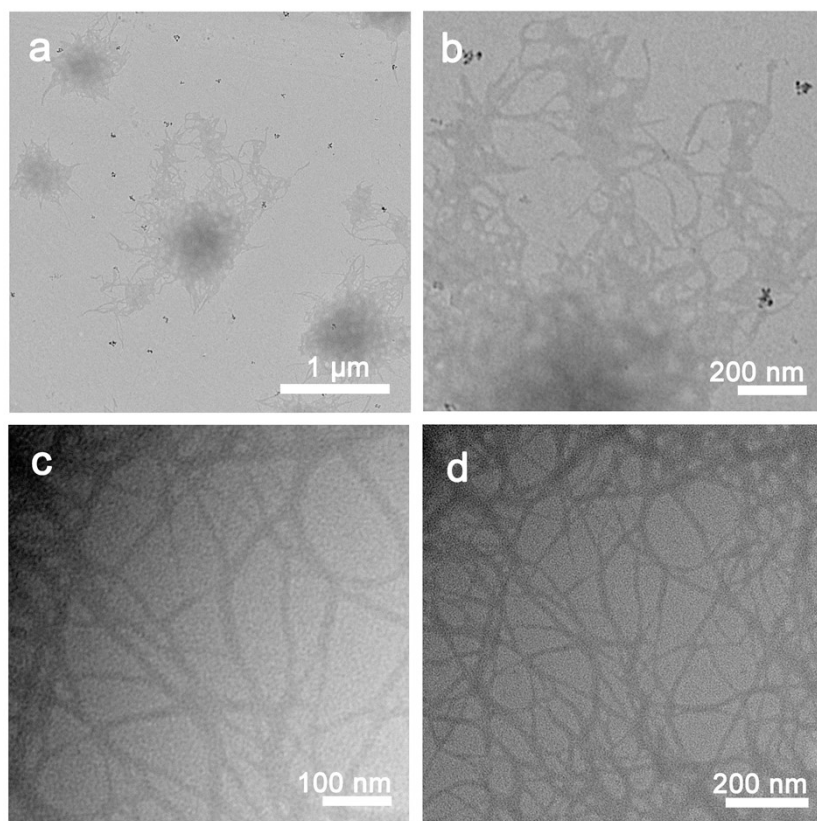

**Fig. S1** TEM images of Gel NapFFY, respectively.

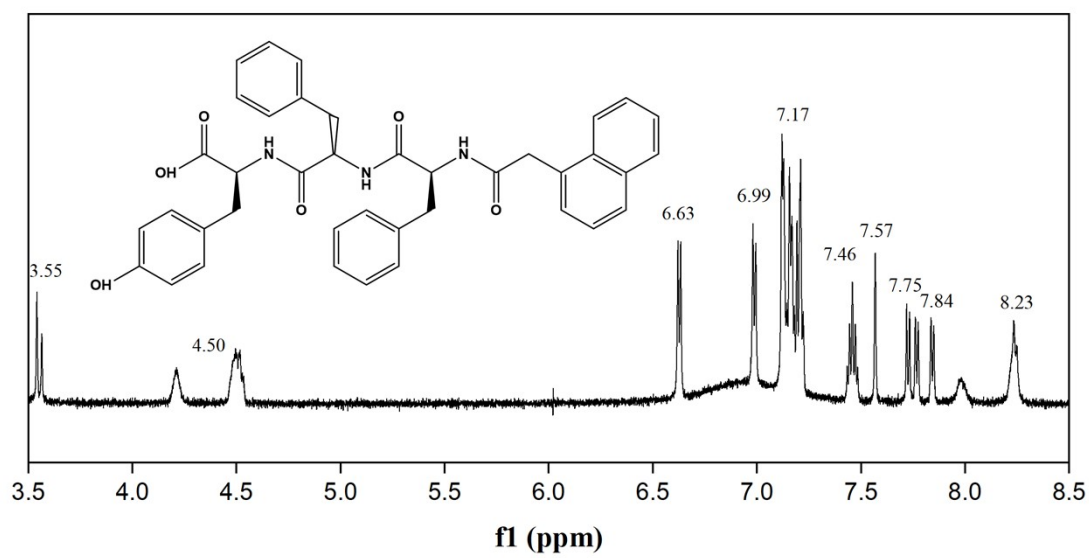

Fig. S2  $^1\text{H}$  NMR spectrum of NapFFY.

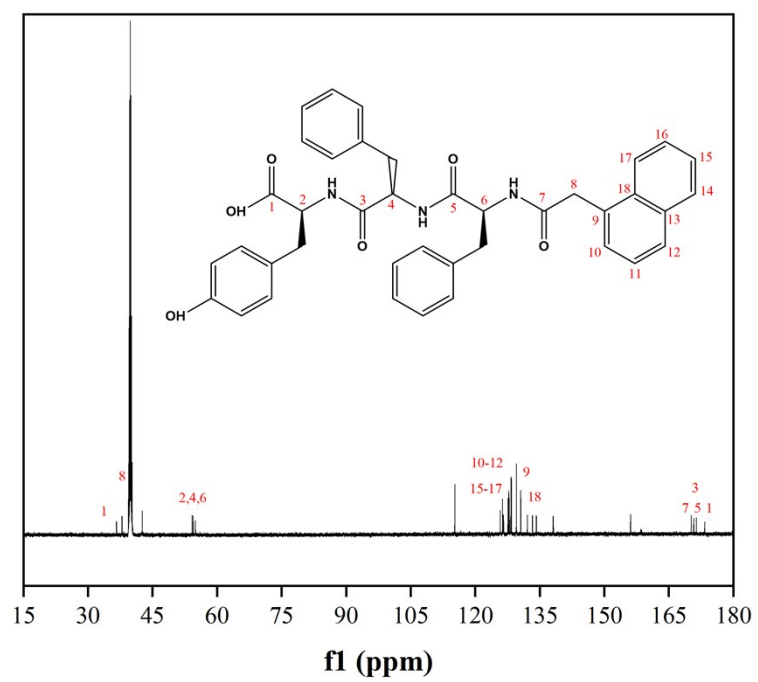

Fig. S3  $^{13}\text{C}$  NMR spectrum of NapFFY.

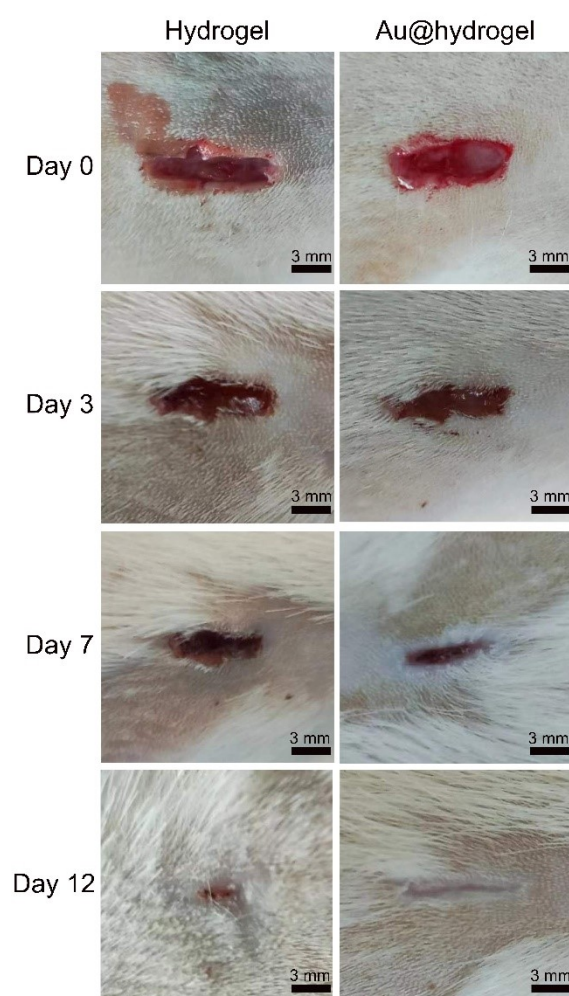

**Fig. S4** Healing of wounds in rats within 12 days of the incision model.
